# Supplementary material
Source: PubMed Central journal article supplement (PMC5925809)
Supplement: supp_RA118.002372_135947_0_supp_79270_p4y9yx.pdf [file supp_RA118.002372_135947_0_supp_79270_p4y9yx.pdf]

Supplemental Data to:

The transcription factor Klf5 is essential for intrahepatic biliary epithelial tissue remodeling  
after cholestatic liver injury

**Hajime Okada<sup>1</sup>, Minami Yamada<sup>1</sup>, Kenji Kamimoto<sup>1</sup>, Cindy Yuet-Yin Kok<sup>1</sup>, Kota  
Kaneko<sup>1</sup>, Masatsugu Ema<sup>2</sup>, Atsushi Miyajima<sup>1</sup>, Tohru Itoh<sup>1</sup>**

Figure S1, related to Figure 1: Klf5-LKO mice show normal liver development.

Figure S2, related to Figure 2: DR induction upon DDC-induced liver injury is suppressed in Klf5-LKO mice.

Figure S3, related to Figure 3: The Klf5 expression in BECs is maintained under different types of liver injury conditions.

Figure S4, related to Figure 5: Effect of Klf5 deletion on pathway activations and cellular functions in the DDC-injured liver.

Figure S5, related to Figure 5: Gene expression and/or functional analyses on candidate signaling pathways and molecules functioning upstream or downstream of Klf5.

Figure S1

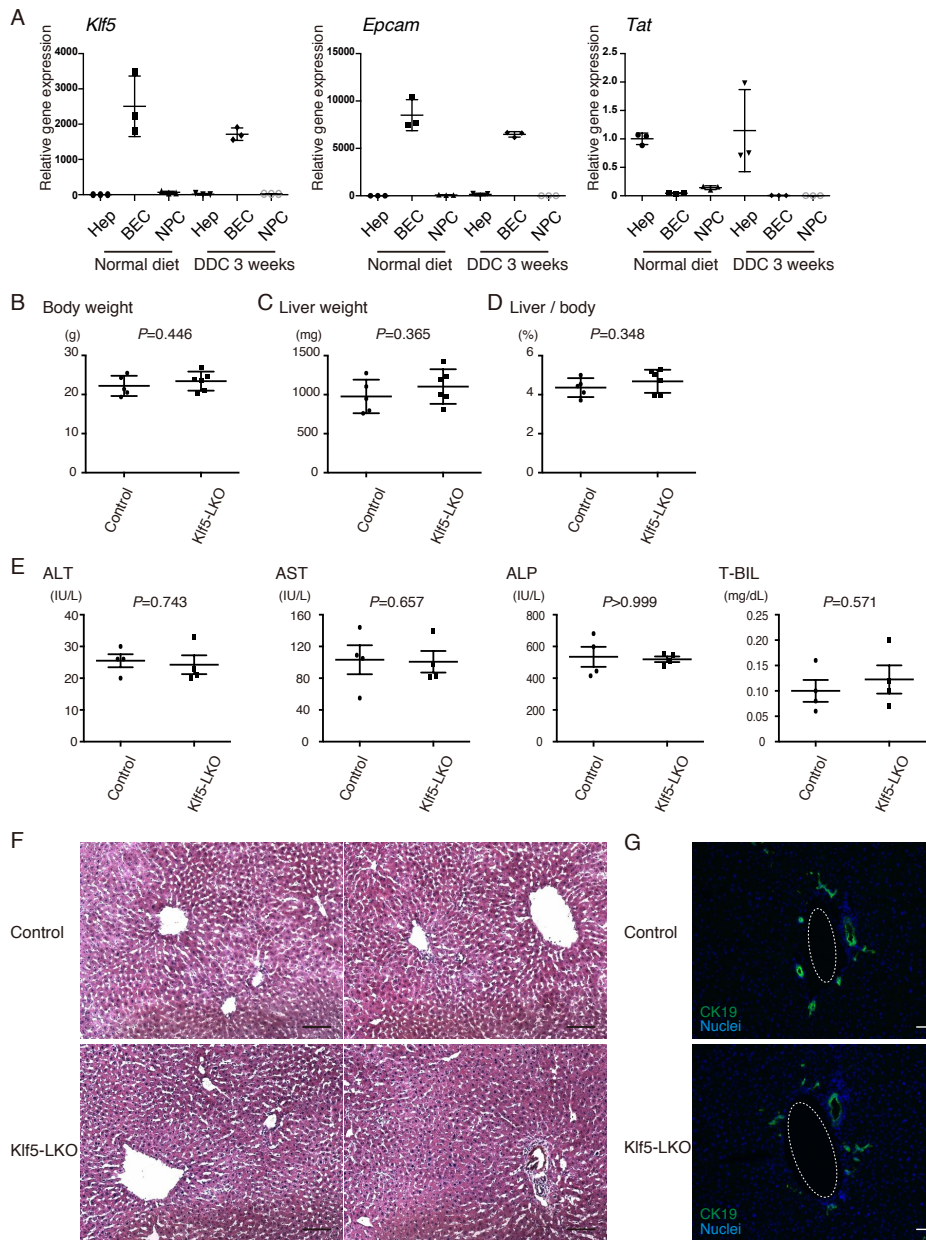

**Supplemental Figure 1. Klf5-LKO mice show normal liver development.** (A) Expression level of *Klf5* in liver cell fractions collected from DDC-treated (three weeks) and non-treated (Normal diet) WT mice. The same data set used in Figure 1B for DDC injury condition was re-analyzed to compare the levels of *Klf5* expression under normal and injury conditions. Adequate cell fractionations were confirmed by analyses of a BEC marker gene (*Epcam*) and a hepatocyte marker gene (*Tat*). (B–D) Klf5-LKO mice did not show any significant difference from control mice in terms of body weight (B), liver weight (C), and the proportion of the liver weight to the body weight (D). N = 5 and 6 for the control and the Klf5-LKO mice, respectively. P-values calculated by Student *t* test. (E) Serum biochemistry tests for hepatocyte injury markers (ALT and AST) and cholestasis markers (ALP and T-BIL), showing that no liver injury was induced in Klf5-LKO mice under physiological conditions. N = 4 mice for each group. P-values calculated by Mann Whitney *U* test. (F) H&E staining did not show any apparent difference in histology of the liver between the control and Klf5-LKO mice. Scale bar = 100  $\mu$ m. (G) Immunostaining for CK19 (green) in the Klf5-LKO and control livers in normal conditions. Counterstaining for nuclei is also shown (Blue). Dashed lines show portal veins. Scale bar = 100  $\mu$ m.

Figure S2

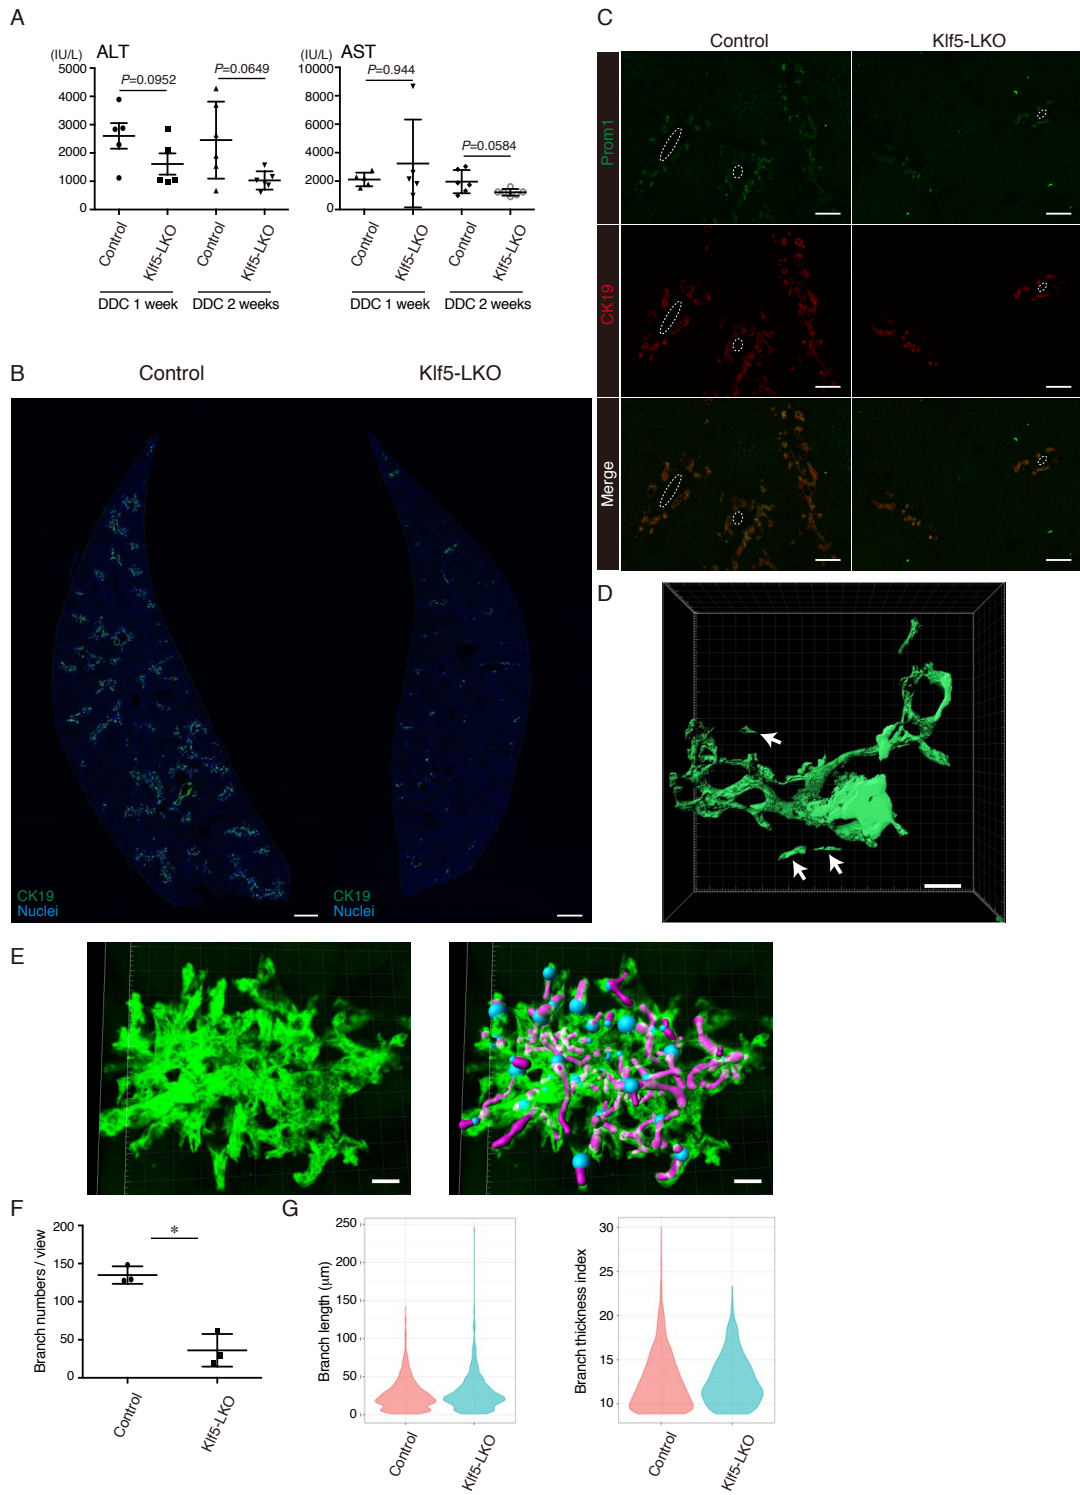

**Supplemental Figure 2. DR induction upon DDC-induced liver injury is suppressed in Klf5-LKO mice.** (A) Serum ALT and AST levels in the Klf5-LKO and control mice upon DDC administration for one week (N = 5 mice for each group) or two weeks (N = 6 mice for each group), showing that hepatocyte injury was not exacerbated in the Klf5-LKO mice. P-values calculated by Mann Whitney *U* test. (B) Representative images for CK19 immunostaining (green) of whole liver sections prepared from the control (left) and Klf5-LKO (right) mice treated with DDC for four weeks. Counterstaining for nuclei is also included (Blue). Scale bar = 500  $\mu$ m. (C) Immunostaining for BEC markers, Prom1 (green) and CK19 (red), in the Klf5-LKO and control livers treated with DDC for four weeks. Scale bar = 100  $\mu$ m. (D) A different view field for 3D immunostaining of CK19 (green) in the liver of DDC-treated Klf5-LKO mice shown in Figure 2F. The image is shown in surface mode. White arrows indicate CK19<sup>+</sup> cells separated from the biliary tree structure. Scale bar = 50  $\mu$ m. (E) Representative images for CK19 staining (green) and traced biliary branch structure (magenta in the right panel) for quantitative analyses of 3D immunostaining data. Scale bar = 50  $\mu$ m. (F) The number of biliary branches per unit view field (636.396  $\mu$ m  $\times$  636.396  $\mu$ m  $\times$  200  $\mu$ m) in the Klf5-LKO and control livers treated with DDC for four weeks. N = 3 mice for each group and more than 5 views were analyzed per mouse. P-value was calculated by Student *t* test to be 0.00540. (G) Violin plots comparing the length (left panel) and the thickness (right panel) of the biliary branches in the Klf5-LKO and control livers treated with DDC for four weeks. “Branch thickness index” was calculated as the square root of the quotient obtained by dividing the branch volume size by the branch length.

Figure S3

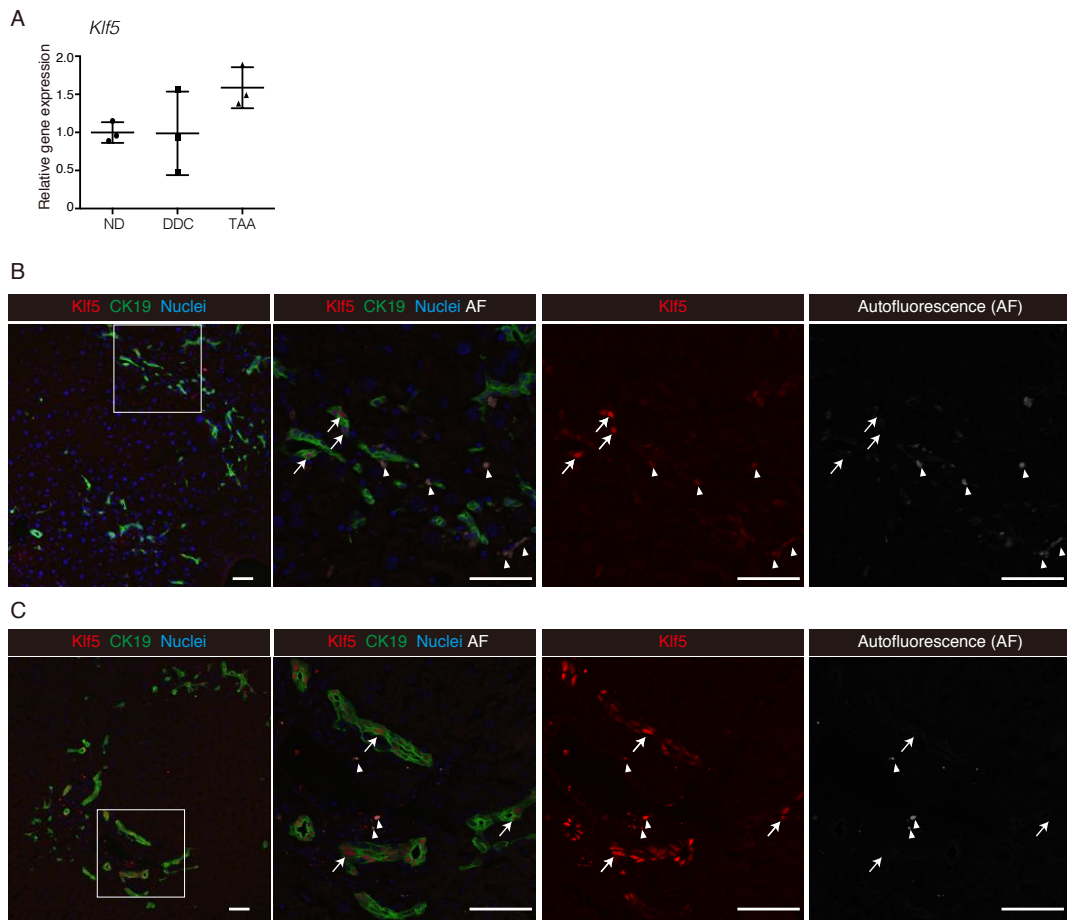

**Supplemental Figure 3. The Klf5 expression in BECs is maintained under different types of liver injury conditions.** (A) Expression levels of *Klf5* in BECs under different injury conditions. mRNA samples were prepared from BEC fractions obtained from the WT mice under physiological conditions (fed normal diet: ND), upon DDC administration for five weeks, or upon TAA administration for eight weeks, and subjected to quantitative RT-PCR analyses. P-value = 0.232 calculated by Kruskal-Wallis test. (B and C) Immunostaining for Klf5 (red) and CK19 (green) in the WT mouse liver upon TAA administration for eight weeks (B) and *Abcb4* KO; *Klf5*<sup>fllox/fllox</sup> mouse (*Abcb4* single knockout mouse) liver at eight weeks after birth (C). Counterstaining for nuclei is shown in blue. A region indicated by a white box in the leftmost panel is magnified in the other three panels. Non-specific autofluorescence signals (arrowheads) were acquired using a filter channel without any corresponding staining and are also shown in gray. Relevant signals for Klf5 are indicated by arrows. Scale bar = 50  $\mu$ m.

Figure S4

A

| Upregulated GO gene sets                                 | SIZE | NOM p-val | FDR q-val |
|----------------------------------------------------------|------|-----------|-----------|
| GO_OSSIFICATION                                          | 14   | 0.00E+00  | 1.01E-02  |
| GO_G_PROTEIN_COUPLED_RECEPTOR_SIGNALING_PATHWAY          | 14   | 0.00E+00  | 1.18E-02  |
| GO_REGULATION_OF_PHOSPHATIDYLINOSITOL_3_KINASE_SIGNALING | 9    | 1.15E-02  | 0.204     |
| GO_RESPONSE_TO_CYTOKINE                                  | 26   | 4.15E-03  | 0.214     |
| GO_NEGATIVE_REGULATION_OF_CELL_PROLIFERATION             | 25   | 8.06E-03  | 0.228     |
| GO_REGULATION_OF_MYELOID_LEUKOCYTE_DIFFERENTIATION       | 7    | 2.72E-03  | 0.231     |
| GO_NEGATIVE_REGULATION_OF_VIRAL_PROCESS                  | 5    | 2.46E-03  | 0.236     |
| GO_CELLULAR_RESPONSE_TO_CYTOKINE_STIMULUS                | 21   | 0.00E+00  | 0.240     |
| GO_REGULATION_OF_SMOOTHENED_SIGNALING_PATHWAY            | 4    | 2.43E-03  | 0.240     |
| GO_NEGATIVE_REGULATION_OF_VIRAL_GENOME_REPLICATION       | 4    | 0.00E+00  | 0.248     |
| GO_REGULATION_OF_MYELOID_CELL_DIFFERENTIATION            | 7    | 2.99E-03  | 0.249     |

B

| gene   | baseMean | log2FC | lfcSE | padj  |
|--------|----------|--------|-------|-------|
| Notch1 | 193      | -0.001 | 0.214 | 0.999 |
| Notch2 | 700      | 0.091  | 0.167 | 0.925 |
| Hes1   | 14419    | 0.158  | 0.210 | 0.890 |
| Hey1   | 23       | 0.201  | 0.172 | 0.770 |
| Jag1   | 14211    | 0.145  | 0.151 | 0.836 |

C

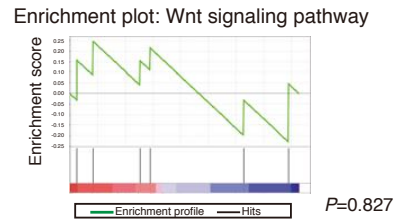

D Reactome pathways gene sets

| Upregulated Reactome pathway gene sets     | SIZE | NOM p-val | FDR q-val |
|--------------------------------------------|------|-----------|-----------|
| REACTOME_CLASS_A1_RHODOPSIN_LIKE_RECEPTORS | 4    | 2.40E-03  | 7.05E-02  |
| REACTOME_GPCR_DOWNSTREAM_SIGNALING         | 8    | 0.00E+00  | 8.39E-02  |
| REACTOME_PEPTIDE_LIGAND_BINDING_RECEPTORS  | 3    | 4.54E-03  | 0.152     |
| REACTOME_G_ALPHA_I_SIGNALLING_EVENTS       | 3    | 6.44E-03  | 0.185     |
| REACTOME_G_ALPHA_Q_SIGNALLING_EVENTS       | 2    | 0.00E+00  | 0.216     |

| Downregulated Reactome pathway gene sets                                                                           | SIZE | NOM p-val | FDR q-val |
|--------------------------------------------------------------------------------------------------------------------|------|-----------|-----------|
| REACTOME_CELL_CYCLE                                                                                                | 26   | 1.96E-02  | 0.158     |
| REACTOME_DNA_REPLICATION                                                                                           | 14   | 4.05E-02  | 0.164     |
| REACTOME_CYCLIN_A_B1_ASSOCIATED_EVENTS_DURING_G2_M_TRANSITION                                                      | 6    | 2.67E-02  | 0.165     |
| REACTOME_MITOTIC_PROMETAPHASE                                                                                      | 8    | 3.12E-02  | 0.177     |
| REACTOME_CELL_CYCLE_MITOTIC                                                                                        | 25   | 2.48E-02  | 0.180     |
| REACTOME_CELL_JUNCTION_ORGANIZATION                                                                                | 6    | 7.96E-03  | 0.201     |
| REACTOME_REGULATION_OF_MITOTIC_CELL_CYCLE                                                                          | 8    | 3.19E-03  | 0.202     |
| REACTOME_APC_C_CDH1_MEDIATED_DEGRADATION_OF_CDCC20_AND_OTHER_APC_C_CDH1_TARGETED_PROTEINS_IN_LATE_MITOSIS_EARLY_G1 | 4    | 1.72E-03  | 0.227     |



**Supplemental Figure 4. Effect of Klf5 deletion on pathway activations and cellular functions in the DDC-injured liver.** (A) The entire list of enriched gene sets categorized in GO biological process terms that were upregulated by Klf5 deletion in BECs. The SIZE column indicates the number of genes hit in each gene set. Gene sets that meet the criteria for both NOM p-val < 0.05 and FDR q-val < 0.25 are considered to be significantly enriched and listed. (B) Expression levels of Notch signaling-related genes as revealed by RNA-seq analysis. (C) Wnt signaling pathway enrichment plot. NOM p-val = 0.817 and FDR q-val = 0.950. (D) The entire list of significantly enriched Reactome pathways gene sets upon loss of Klf5 in BECs under the DDC-induced injury condition. The SIZE column indicates the number of genes hit in each gene set. Gene sets that meet the criteria for both NOM p-val < 0.05 and FDR q-val < 0.25 are considered to be significantly enriched and listed.

Figure S5

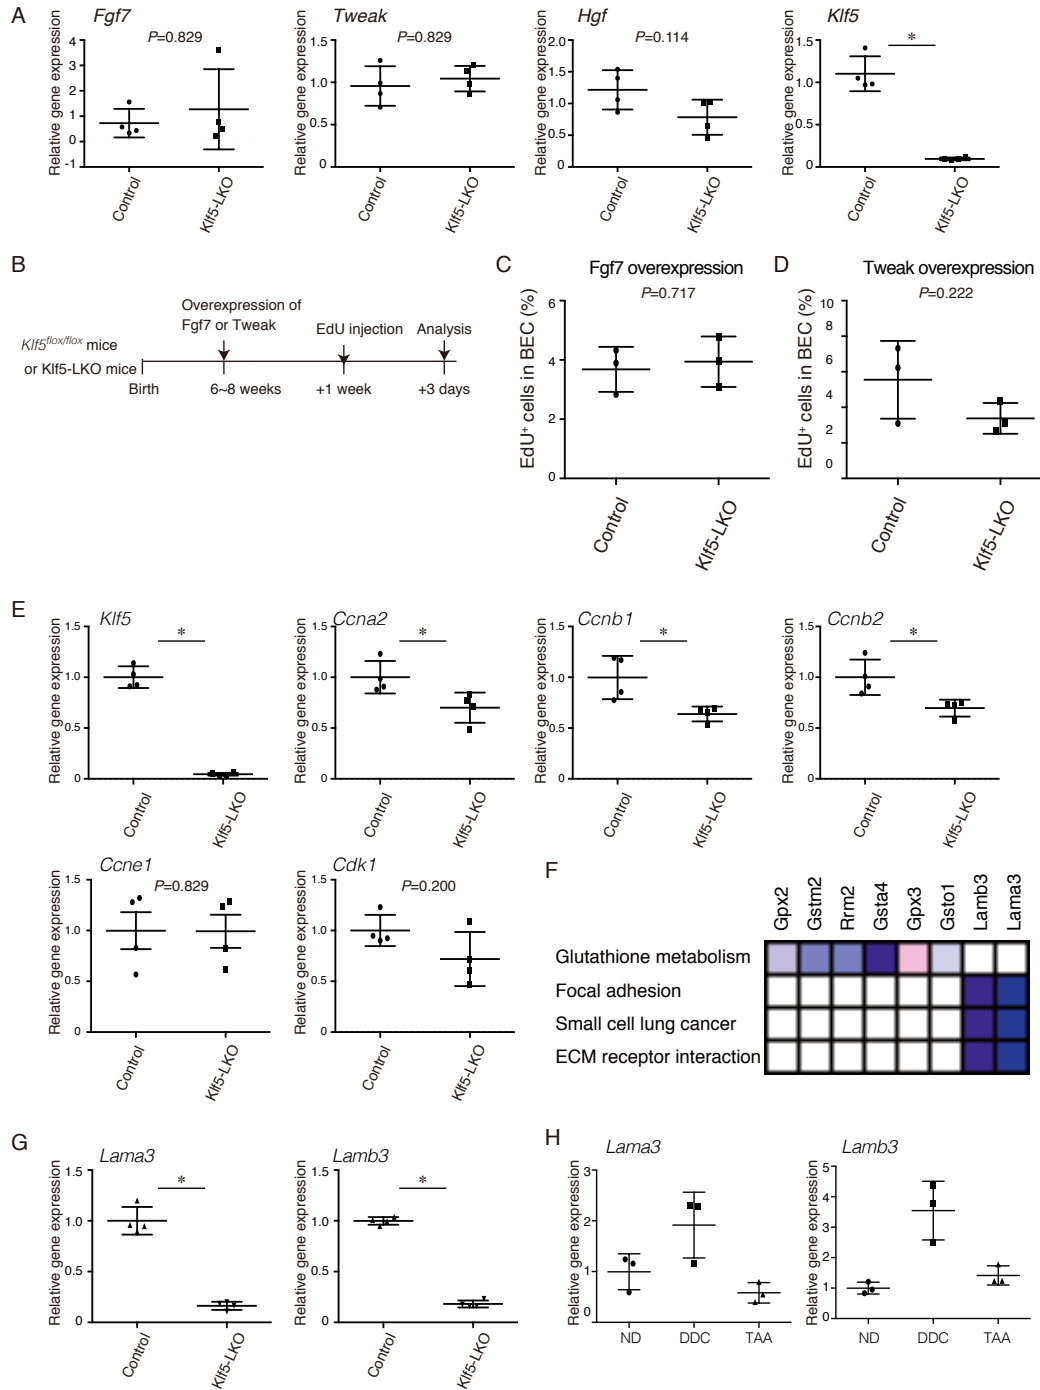

**Supplemental Figure 5. Gene expression and/or functional analyses on candidate signaling pathways and molecules functioning upstream or downstream of Klf5.** (A) Expression levels of cytokines and growth factors involved in DR induction. Whole liver mRNA samples prepared from the control and Klf5-LKO mice treated with DDC for one week were subjected to quantitative RT-PCR analyses. N = 4 mice. P-values calculated by Mann Whitney *U* test. (B) Experimental scheme of *in vivo* EdU incorporation assays to test whether Fgf7 or Tweak functions upstream of Klf5 in promoting BEC proliferation. (C and D) Quantification of EdU<sup>+</sup> BECs in livers of the control and Klf5-LKO mice where Fgf7 (C) or Tweak (D) was overexpressed. BEC fractions isolated from the livers were analyzed by flow cytometry. N = 3 mice for each group. P-values calculated by Student *t* test. (E) Expression levels of cell cycle-related genes. BEC mRNA samples prepared from the control and Klf5-LKO mice treated with DDC for two weeks were subjected to quantitative RT-PCR analyses. N = 4 mice. P-values were calculated by Mann Whitney *U* test and were as follows: 0.0286 (*Klf5*), 0.0286 (*Ccna2*), 0.0286 (*Ccnb1*), and 0.0286 (*Ccnb2*). (F) Leading edge analysis of the entire list of enriched KEGG pathway gene sets shown in Figure 5F. The range of colors in the heatmap (pink, light blue, and dark blue) corresponds to the range of gene expression values (moderate, low, and lowest, respectively). (G) Expression levels of the *Lama3* and *Lamb3* genes. BEC mRNA samples prepared from the control and Klf5-LKO mice treated with DDC for two weeks were subjected to quantitative RT-PCR analyses. N = 4 mice. P-values were calculated by Mann Whitney *U* test and were as follows: 0.0286 (*Lama3*) and 0.0286 (*Lamb3*). (H) Expression profiles of *Lama3* and *Lamb3* in BECs upon liver injury. BEC mRNA samples prepared from the WT mice under physiological conditions (fed normal diet: ND), upon DDC administration for five weeks, or upon TAA administration for eight weeks were subjected to quantitative RT-PCR analyses. P-values were calculated by Kruskal-Wallis test and were as follows: 0.0286 (*Lama3*) and 0.00360(*Lamb3*).
